# Supplementary material for: Rapid and Culture Free Identification of Francisella in Hare Carcasses by High-Resolution Tandem Mass Spectrometry Proteotyping
Source: Front Microbiol. 2020 May 8;11:636. doi: 10.3389/fmicb.2020.00636 (PMC7225524; doi:10.3389/fmicb.2020.00636)
Supplement: Supplementary file 5 [file Table_5.xlsx]

## Sheet: Table S5
Supplementary Table 5. Identified unique marker peptides of Francisella ssp. in infected hare carcasses. Only replicates with at least one hit are shown.
Protein names	Peptide	Protein modifications	16T0017_rep1	16T0017_rep4	16T0017_rep5	18T0118_rep1	18T0118_rep2	18T0118_rep3	18T0118_rep4	18T0118_rep5	18T0124_rep1	18T0124_rep2	18T0124_rep3	18T0124_rep4	18T0124_rep5	Containing samples	Total
			1	1	1	50	47	47	51	48	3	4	2	4	7	13	266	# hits for sample
			1	1	1	36	33	33	32	32	2	2	1	3	5	13	182	# unique peptides for sample
Glutamate dehydrogenase	ADIAIPAATQNEIDFEDAQK	ADIAIPAATQNEIDFEDAQK	0	0	0	1	0	0	2	1	0	0	0	0	0	3	4
Uncharacterized protein, DNA polymerase I	ADIYNLTYVIEDVR	.(Acetyl)ADIYNLTYVIEDVR	0	1	0	0	0	0	0	0	0	0	0	0	0	1	1
Uncharacterized protein	ADVNLNAEGLDVNIK	ADVNLNAEGLDVNIK	0	0	0	1	0	0	0	0	0	0	0	0	0	1	1
Uncharacterized protein	AEEILEDNSPSETK	AEEILEDNSPSETK	0	0	0	1	1	0	1	1	0	0	0	0	0	4	4
Oxoglutarate dehydrogenase (Succinyl-transferring), E1 component (EC 1.2.4.2), 2-oxoglutarate dehydrogenase E1 component (EC 1.2.4.2), 2-oxoglutarate dehydrogenase complex, E1 component, 2-oxoglutarate decarboxylase, 2-oxoglutarate dehydrogenase E1 component	AIPLQQVINK	AIPLQQVINK	0	0	0	1	0	0	1	1	0	0	0	0	0	3	3
Outer-membrane lipoprotein carrier protein, Outer membrane lipoprotein chaperone LolA	APQNTDIIDETK	APQNTDIIDETK	0	0	0	1	0	1	1	1	0	0	0	0	0	4	4
17 kDa major membrane protein (TUL4), 17 kDa lipoprotein (Fragment), 17 kDa major membrane protein (Tul4) (Fragment), 17kDa major membrane protein (Major membrane protein) (Fragment), LpnA protein (Fragment), Membrane protein (Fragment), 17 kDa major membrane protein (Fragment), 17kDa lipoprotein TUL4 (Fragment), Tul4 (Fragment), LpnA (Fragment), Putative 17 kDa major membrane protein, 17kDa oute…	ATVYTAYNNNPQGSVR	ATVYTAYNNNPQGSVR	0	0	0	2	1	2	2	1	0	0	0	0	0	5	8
Aconitate hydratase A (ACN) (Aconitase) (EC 4.2.1.3) ((2R,3S)-2-methylisocitrate dehydratase) ((2S,3R)-3-hydroxybutane-1,2,3-tricarboxylate dehydratase) (Iron-responsive protein-like) (IRP-like) (Probable 2-methyl-cis-aconitate hydratase) (EC 4.2.1.99) (RNA-binding protein), Aconitate hydratase (Aconitase) (EC 4.2.1.3)	AYATVLDGTEEWQK	AYATVLDGTEEWQK	0	0	0	0	1	1	1	0	0	0	0	0	0	3	3
Rotein	DASQAADILVNK	DASQAADILVNK	0	0	0	1	1	1	1	0	0	0	0	0	1	5	5
Peroxiredoxin (EC 1.11.1.15), Peroxiredoxin	DNADNDPYGESSPENLLK	DNADNDPYGESSPENLLK	0	0	0	2	4	3	2	5	0	0	0	0	1	6	17
Peptidase M3 family protein, Oligopeptidase A (EC 3.4.24.70), M3 family peptidase	DNLTNEQAQAVR	DNLTNEQAQAVR	0	0	0	0	0	1	0	0	0	0	0	0	0	1	1
Uncharacterized protein, Peptidase, M24 family protein (EC 3.4.-.-), X-prolyl aminopeptidase 2, Xaa-Pro aminopeptidase, Aminopeptidase P family protein	DYYQFYQDLEATTGK	DYYQFYQDLEATTGK	0	0	0	0	1	0	0	0	0	0	0	0	0	1	1
Elongation factor Tu (EF-Tu), Elongation factor Tu	ELLDQYEFPGDDTPVIMGSALR	ELLDQYEFPGDDTPVIMGSALR	0	0	0	1	0	0	0	0	0	0	0	0	0	1	1
Chaperone protein HtpG (Heat shock protein HtpG) (High temperature protein G)	ESQDTIYYITSDSYK	ESQDTIYYITSDSYK	0	0	0	1	2	3	1	2	0	0	0	0	0	5	9
Shikimate kinase (SK) (EC 2.7.1.71)	EVISEILAEK	EVISEILAEK	0	0	0	0	0	0	0	1	0	0	0	0	0	1	1
50S ribosomal protein L7/L12	FGVSAAAAVAVAAGPVAGPVEAAEEK	FGVSAAAAVAVAAGPVAGPVEAAEEK	0	0	0	1	0	1	0	0	0	0	0	1	0	3	3
Ferritin (EC 1.16.3.2), Ferritin	FYDLMNIALEEK	FYDLMNIALEEK	0	0	0	2	0	1	2	1	0	0	0	0	0	4	6
Pyruvate kinase (EC 2.7.1.40)	GDLAVEIGDENVPTIQK	GDLAVEIGDENVPTIQK	0	0	0	1	2	2	2	2	0	0	0	0	0	5	9
Chaperone protein HtpG (Heat shock protein HtpG) (High temperature protein G)	GEVTNEEYQEFYK	GEVTNEEYQEFYK	0	0	0	1	0	0	0	1	0	0	0	0	0	2	2
Catalase-peroxidase (CP) (EC 1.11.1.21) (Peroxidase/catalase), Catalase/peroxidase HPI (EC 1.11.1.21)	QAGYNIQMPFVPGR	QAGYNIQM(Oxidation)PFVPGR, QAGYNIQMPFVPGR	0	0	0	2	2	3	3	2	0	0	0	0	0	5	12
Oxoglutarate dehydrogenase (Succinyl-transferring), E1 component (EC 1.2.4.2), 2-oxoglutarate dehydrogenase E1 component (EC 1.2.4.2), 2-oxoglutarate dehydrogenase E1 component	IEDTAVIPSDSK	IEDTAVIPSDSK	0	0	0	0	1	0	1	0	0	0	0	0	0	2	2
Translation initiation factor IF-2	IEEIVAEDDEGLAASDK	IEEIVAEDDEGLAASDK	0	0	0	0	1	0	0	0	0	0	0	0	0	1	1
DNA-directed RNA polymerase subunit alpha 1 (RNAP subunit alpha 1) (EC 2.7.7.6) (RNA polymerase subunit alpha 1) (Transcriptase subunit alpha 1), DNA-directed RNA polymerase subunit alpha (RNAP subunit alpha) (EC 2.7.7.6) (RNA polymerase subunit alpha) (Transcriptase subunit alpha), DNA-directed RNA polymerase subunit alpha (EC 2.7.7.6)	LEFVPNIQLK	LEFVPNIQLK	0	0	0	1	1	0	0	0	0	0	0	0	0	2	2
50S ribosomal protein L9	LFGSVGIAEVAEAVSNQSGK	LFGSVGIAEVAEAVSNQSGK	0	0	0	1	1	1	2	2	0	0	0	0	0	5	7
Citrate synthase, Citrate synthase (EC 2.3.3.16)	LFSNVDFYSGIILK	LFSNVDFYSGIILK	0	0	0	0	1	1	0	0	0	0	0	0	0	2	2
Glycerophosphoryl diester phosphodiesterase family protein, Glycerophosphodiester phosphodiesterase	LGGIFWEPFEK	LGGIFWEPFEK	0	0	0	1	1	1	1	1	0	0	0	0	0	5	5
Uncharacterized protein, Phage tail protein	IIADTDAIK	IIADTDAIK	0	0	0	1	1	0	1	0	0	0	0	0	0	3	3
Ferritin-like domain protein, Bacterioferritin	ILELEMSGIVR	ILELEM(Oxidation)SGIVR, ILELEMSGIVR	0	0	0	3	1	2	2	1	1	0	0	1	1	8	12
	LILDTQIISNK	LILDTQIISNK	0	0	0	0	1	1	0	0	0	0	0	0	0	2	2
Uncharacterized protein	LPGTENIIYGVVLK	LPGTENIIYGVVLK	0	0	0	1	0	0	0	0	0	0	0	0	0	1	1
3-oxoacyl-[acyl-carrier-protein] reductase (EC 1.1.1.100), 3-oxoacyl-(Acyl-carrier-protein) reductase (EC 1.1.1.100), 3-oxoacyl-ACP reductase FabG (EC 1.1.1.100), 3-oxoacyl-ACP reductase FabG (3-oxoacyl-[acyl-carrier-protein] reductase) (EC 1.1.1.100)	IPSGQIGEPK	IPSGQIGEPK	0	0	0	0	0	1	0	1	0	0	0	0	0	2	2
Leucine--tRNA ligase (EC 6.1.1.4) (Leucyl-tRNA synthetase) (LeuRS), Leucine--tRNA ligase (EC 6.1.1.4)	LPTDVALTEAGSPLK	LPTDVALTEAGSPLK	0	0	0	1	1	1	0	1	0	0	0	0	0	4	4
DUF2147 domain-containing protein	LSPEGYWVQFDEDNDVGR	LSPEGYWVQFDEDNDVGR	0	0	0	0	1	0	0	0	0	0	0	0	0	1	1
Dihydrolipoyllysine-residue succinyltransferase component of 2-oxoglutarate dehydrogenase complex (EC 2.3.1.61) (2-oxoglutarate dehydrogenase complex component E2)	ITAGGATATAK	ITAGGATATAK	1	0	1	0	0	0	0	0	0	0	0	0	0	2	2
Dihydrolipoyllysine-residue succinyltransferase component of 2-oxoglutarate dehydrogenase complex (EC 2.3.1.61) (2-oxoglutarate dehydrogenase complex component E2), 2-oxoglutarate dehydrogenase complex dihydrolipoyllysine-residue succinyltransferase (EC 2.3.1.61)	ITAGGATATTK	ITAGGATATTK	0	0	0	2	2	1	2	2	0	0	0	0	0	5	9
Uncharacterized protein, Putative lipoprotein	LVVDVLDYNPPAR	LVVDVLDYNPPAR	0	0	0	1	0	0	0	0	0	0	0	0	0	1	1
RmlD substrate binding domain protein, Uncharacterized protein, Short chain dehydrogenase, Putative short-chain dehydrogenase, RmlD substrate binding domain protein (Short chain dehydrogenase), Short chain dehydrogenase family protein	NAGYEIVTVSFSGDK	NAGYEIVTVSFSGDK	0	0	0	1	1	1	2	1	0	0	0	0	0	5	6
10 kDa chaperonin (GroES protein) (Protein Cpn10)	SAGGIILTGNAQEK	SAGGIILTGNAQEK	0	0	0	2	2	1	2	1	2	3	2	2	3	10	20
60 kDa chaperonin (GroEL protein) (Protein Cpn60), Chaperonin GroEL	SALQHAASIAGLMITTEAMIGEIK	SALQHAASIAGLMITTEAMIGEIK, SALQHAASIAGLM(Oxidation)ITTEAM(Oxidation)IGEIK	0	0	0	1	1	1	1	1	0	1	0	0	0	6	6
Catalase-peroxidase (CP) (EC 1.11.1.21) (Peroxidase/catalase)	SDGFINYTDGSISADK	SDGFINYTDGSISADK	0	0	0	3	4	4	5	5	0	0	0	0	0	5	21
Enoyl-CoA hydratase/isomerase family protein, Fusion product of 3-hydroxacyl-CoA dehydrogenase and acyl-CoA-binding protein (EC 1.1.1.35) (EC 4.2.1.17) (EC 5.1.2.3) (EC 5.3.3.8), 3-hydroxyacyl-CoA dehydrogenase	SQQGSANVIIEDSLAK	SQQGSANVIIEDSLAK	0	0	0	2	2	2	2	2	0	0	0	0	0	5	10
Uncharacterized protein	SLNIDSTQGSTANEIDTYADK	SLNIDSTQGSTANEIDTYADK	0	0	0	1	0	1	1	1	0	0	0	0	0	4	4
D-alanyl-D-alanine carboxypeptidase (D-alanyl-D-alanine carboxypeptidase family protein)	TGQNVGNLVITLGDTK	TGQNVGNLVITLGDTK	0	0	0	0	0	1	0	0	0	0	0	0	0	1	1
Acetyltransferase component of pyruvate dehydrogenase complex (EC 2.3.1.12), Pyruvate dehydrogenase complex dihydrolipoyllysine-residue acetyltransferase (EC 2.3.1.12)	TQGSAPVEQTSSQPAPAK	TQGSAPVEQTSSQPAPAK	0	0	0	2	1	1	1	1	0	0	0	0	0	5	6
Chitinase, Fibronectin type III domain protein, Chitinase A (Fragment)	TLDASADSWGLSASAR	TLDASADSWGLSASAR	0	0	0	0	0	1	0	0	0	0	0	0	0	1	1
Malic enzyme, NAD binding domain protein (NAD-dependent malic enzyme)	VAFALIGYLPEK	VAFALIGYLPEK	0	0	0	1	1	1	1	1	0	0	0	0	0	5	5
Glutamate--tRNA ligase (EC 6.1.1.17) (Glutamyl-tRNA synthetase) (GluRS)	VAITSSGQSPDIGITLK	VAITSSGQSPDIGITLK	0	0	0	2	2	1	2	2	0	0	0	0	0	5	9
Isocitrate dehydrogenase [NADP] (EC 1.1.1.42) (Oxalosuccinate decarboxylase), NADP-dependent isocitrate dehydrogenase (EC 1.1.1.42)	VEVIDAEGNVIFEHQVEK	VEVIDAEGNVIFEHQVEK	0	0	0	0	0	0	1	1	0	0	0	0	0	2	2
Enoyl-CoA hydratase/isomerase family protein, Fusion product of 3-hydroxacyl-CoA dehydrogenase and acyl-CoA-binding protein (EC 1.1.1.35) (EC 4.2.1.17) (EC 5.1.2.3) (EC 5.3.3.8), Bifunctional protein: 3-hydroxacyl-CoA dehydrogenase/acyl-CoA-binding protein, Enoyl-CoA hydratase / 3,2-trans-enoyl-CoA isomerase / 3-hydroxyacyl-CoA dehydrogenase, 3-hydroxyacyl-CoA dehydrogenase, 3-hydroxyacyl-CoA deh…	VFGEEYLPAGESDNDSPSSTIASK	VFGEEYLPAGESDNDSPSSTIASK	0	0	0	0	0	0	0	1	0	0	0	0	0	1	1
Tryptophan synthase alpha chain (EC 4.2.1.20), Tryptophan synthase subunit alpha (EC 4.2.1.20)	VGIAQIFIAPPDASESTLK	VGIAQIFIAPPDASESTLK	0	0	0	0	1	0	0	0	0	0	0	0	0	1	1
Biotin carboxyl carrier protein of acetyl-CoA carboxylase, Acetyl-CoA carboxylase biotin carboxyl carrier protein	VNLAEEISGEEIK	VNLAEEISGEEIK	0	0	0	2	1	2	2	2	0	0	0	0	1	6	10
Uncharacterized protein	VPVHLELEK	VPVHLELEK	0	0	0	1	1	1	1	1	0	0	0	0	0	5	5
Glyceraldehyde-3-phosphate dehydrogenase (EC 1.2.1.-)	VVISAPAGNDLPTVVFSVNHDILSADDK	VVISAPAGNDLPTVVFSVNHDILSADDK	0	0	0	1	2	1	1	1	0	0	0	0	0	5	6
Uncharacterized protein, LD-carboxypeptidase family protein, Peptidase, U61 family, Muramoyl-tetrapeptide carboxypeptidase (MccF/LdcA family), LD-carboxypeptidase, LD-carboxypeptidase (LD-carboxypeptidase family protein)	YLDIYPSDFGYSNPDSIR	YLDIYPSDFGYSNPDSIR	0	0	0	0	0	0	1	0	0	0	0	0	0	1	1
